# Supplementary material for: A crowdsourced intervention to promote hepatitis B and C testing among men who have sex with men in China: A nationwide online randomized controlled trial
Source: PubMed Central journal article supplement — eClinicalMedicine. 2019 Nov 18;16:64–73. doi: 10.1016/j.eclinm.2019.10.007 (PMC6890946; doi:10.1016/j.eclinm.2019.10.007), 2019-11-18
Supplement: mmc3.pdf [file mmc3.pdf]

## Author statements

Please insert the relevant text under the subheadings below. A completed form must be signed by all authors. Please note that we will accept hand-signed and electronic (typewritten) signatures. Please complete multiple forms if necessary, and upload the signed copy with your submission.

**Manuscript title:** A crowdsourced intervention to promote hepatitis B and C testing among men who have sex with men in China: a nationwide online randomized controlled trial

**Corresponding author:** Thomas Fitzpatrick

**Article type:** Clinical Trials

Does your manuscript have a reference number? No  Yes  If yes, enter number here: **ECLINM-D-19-00015R1**

Does your manuscript have a handling editor? No  Yes  If yes, enter name here: **Derek Anane**

### Authors' contributions

Please insert here the contribution each author made to the manuscript—eg, literature search, figures, study design, data collection, data analysis, data interpretation, writing etc. If all authors contributed equally, please state this. The information provided here must match the contributors' statement in the manuscript.

TF and JDT conceived the study. TF, WT, PC, YC, WW, and JDT contributed to intervention development, and TF, WT, XP, LL, and JDT contributed to intervention implementation. TF, KZ, KM, YC, and JDT contributed to protocol design. YC, LL, and JDT provided oversight. TF conducted the data analyses with input from KM, WT, and JDT. TF wrote the initial draft and oversaw the editing process, with input from KZ, PC, YC, KM, XP, WW, and JDT. All authors read and authorized the final manuscript before submission.

## Role of the funding source

Please disclose any funding sources and their role, if any, in the writing of the manuscript or the decision to submit it for publication. Examples of involvement include: data collection, analysis, or interpretation; trial design; patient recruitment; or any aspect pertinent to the study. Please also comment whether you have been paid to write this article by a pharmaceutical company or other agency. If you are the corresponding author, please indicate if you had full access to all the data in the study and had final responsibility for the decision to submit for publication. The information provided here must match the role of the funding source statement in the manuscript.

This work is supported in part by the Doris Duke Charitable Foundation through a grant supporting the Doris Duke International Clinical Research Fellows Program at University of North Carolina at Chapel Hill. TF is a Doris Duke International Research Fellow. This work is also supported by the National Institutes of Health (National Institute of Allergy and Infectious Diseases 1R01AI114310-01), UNC CFAR (P30 AI50410), and SESH Global (www.seshglobal.org). This work also receives administrative assistance from the Guangzhou Eighth People's Hospital, UNC Chapel Hill, and UNC – Project China. The listed funders played no role in the development or implementation of this study. TF had full access to all data in the study and had final

## Conflicts of interest

Please complete the ICMJE conflict of interest form, which is available at <http://www.thelancet.com/for-authors/forms#icmje-coi>. Please ensure that a conflict of interest statement is included at the end of the manuscript, which matches what is declared on the ICMJE conflict of interest form.

## Patient consent (if applicable) - completion of this section is mandatory for Case Reports, Clinical Pictures, and Adverse Drug Reactions.

Please sign below to confirm that all necessary consents required by applicable law from any relevant patient, research participant, and/or other individual whose information is included in the article have been obtained in writing. **The signed consent form(s) should be retained by the corresponding author and NOT sent to EClinicalMedicine.**

I agree with: the plan to submit to *EClinicalMedicine*; the contents of the manuscript; to being listed as an author; and to the conflicts of interest statement as summarised. I have had access to all the data in the study (for original research articles) and accept responsibility for its validity.

|                 |                    |                 |       |            |                                                                                       |       |              |
|-----------------|--------------------|-----------------|-------|------------|---------------------------------------------------------------------------------------|-------|--------------|
| Title and name: | Thomas Fitzpatrick | Highest degree: | M.D.  | Signature: |  | Date: | 9/18/2019    |
| Title and name: | Weiming Tang       | Highest degree: | M.D.  | Signature: |  | Date: | 9/19/2019    |
| Title and name: | Katie Mollan       | Highest degree: | M.S.  | Signature: |  | Date: | 9/19/2019    |
| Title and name: | Xin Pan            | Highest degree: | B.A.  | Signature: |  | Date: | 9/23/2019    |
| Title and name: | Po-lin Chan        | Highest degree: | M.D.  | Signature: |  | Date: | 9/25/2019    |
| Title and name: | Kali Zhou          | Highest degree: | M.D.  | Signature: |  | Date: | 9/25/2019    |
| Title and name: | Yu Cheng           | Highest degree: | Ph.D. | Signature: |  | Date: | 9/25/2019    |
| Title and name: | Linghua Li         | Highest degree: | M.D.  | Signature: |  | Date: | 9/25/2019    |
| Title and name: | William CW Wong    | Highest degree: | M.D.  | Signature: |  | Date: | 9/25/2019    |
| Title and name: | Joseph D. Tucker   | Highest degree: | MD    | Signature: |  | Date: | 19 Sept 2019 |

## Corresponding author declaration

I  , the corresponding author of this manuscript, certify that the contributors' and conflicts of interest statements included in this paper are correct and have been approved by all co-authors.
